# Supplementary material for: TGF-β1-Induced Upregulation of MALAT1 Promotes Kazakh's Esophageal Squamous Cell Carcinoma Invasion by EMT
Source: PubMed Central journal article supplement (PMC7592017; doi:10.7150/jca.48426), 2020-10-04
Supplement: jcav11p6892s1.pdf [file jcav11p6892s1.pdf]

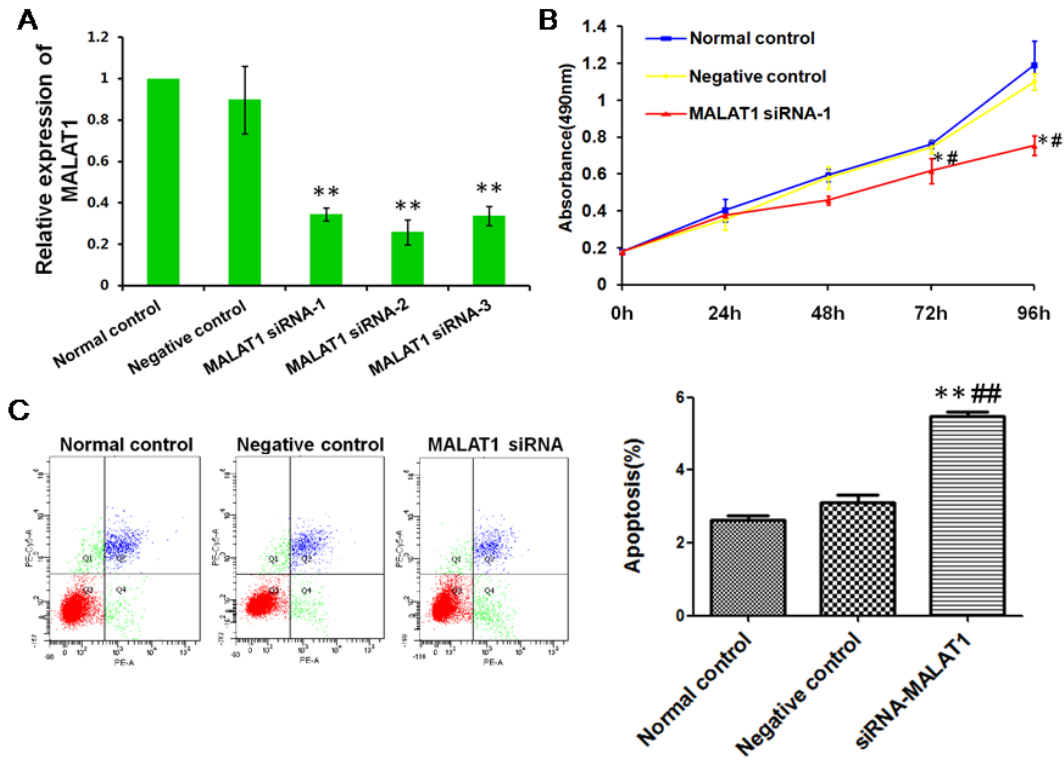

**Supplementary Figure 1. MALAT1 promoted proliferation of ESCC in another ESCC cell line.** (A) qRT-PCR showed that MALAT1 siRNA significantly reduced expression of MALAT1 in KYSE150 cell; (B) MTT assays revealed that MALAT1 knockdown significantly reduced the growth rate of KYSE150 cell; (C) FCM showed that knockdown of MALAT1 significantly enhanced cell apoptosis. (\*\*: compared with normal control,  $P < 0.01$ ; ##: compared with negative control,  $P < 0.01$ ).

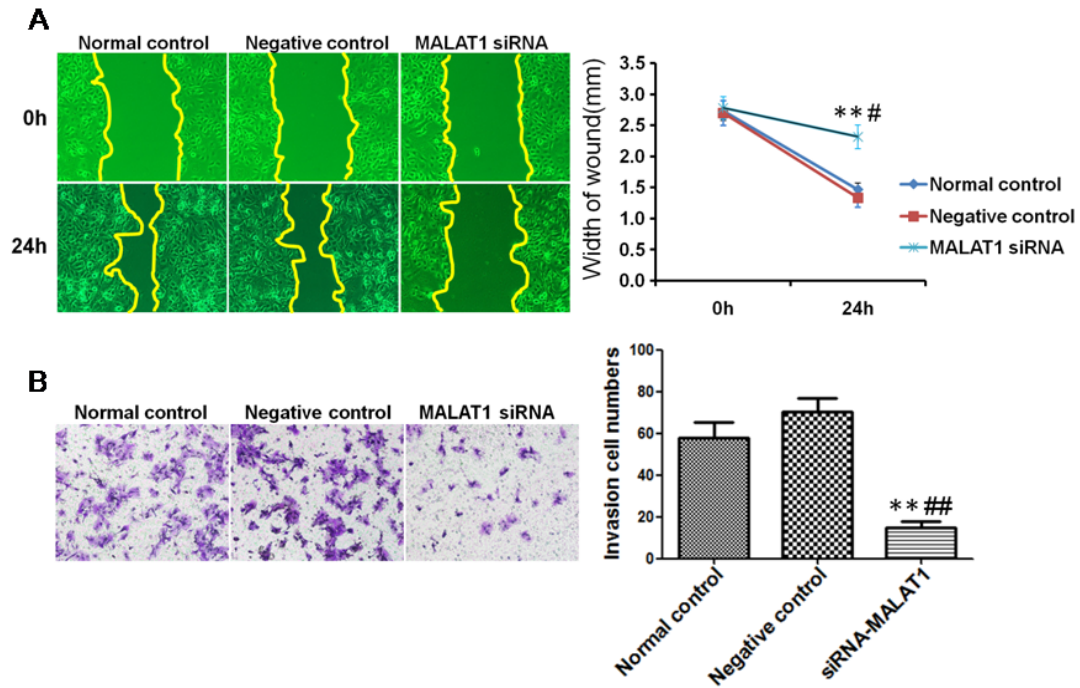

**Supplementary Figure 2. MALAT1 promoted invasion of ESCC in another ESCC cell line.**

(A) migratory variation of KYSE150 was analyzed using wound healing assay after MALAT1 knockdown. Magnification: 100 $\times$ ; (B) Transwell assay showed the cell invasive variation of KYSE150 after MALAT1 knockdown. Magnification: 200 $\times$ . (\*\*: compared with normal control,  $P < 0.01$ ; ##: compared with negative control,  $P < 0.01$ ).

**Supplementary Table1. Predicted miRNAs regulated by MALAT1.**

| <b>name</b>     | <b>mirAccession</b> | <b>geneName</b> |
|-----------------|---------------------|-----------------|
| hsa-miR-200b-3p | MIMAT0000318        | MALAT1          |
| hsa-miR-200a-3p | MIMAT0000682        | MALAT1          |
| hsa-miR-429     | MIMAT0001536        | MALAT1          |
| hsa-miR-378f    | MIMAT0018932        | MALAT1          |
| hsa-miR-30e-5p  | MIMAT0000692        | MALAT1          |
| hsa-miR-30c-5p  | MIMAT0000244        | MALAT1          |
| hsa-miR-101-3p  | MIMAT0000099        | MALAT1          |
| hsa-miR-197-3p  | MIMAT0000227        | MALAT1          |
| hsa-miR-320b    | MIMAT0005792        | MALAT1          |
| hsa-miR-92b-3p  | MIMAT0003218        | MALAT1          |
| hsa-miR-181b-5p | MIMAT0000257        | MALAT1          |
| hsa-miR-181a-5p | MIMAT0000256        | MALAT1          |
| hsa-miR-135b-5p | MIMAT0000758        | MALAT1          |
| hsa-miR-205-5p  | MIMAT0000266        | MALAT1          |
| hsa-miR-194-5p  | MIMAT0000460        | MALAT1          |
| hsa-miR-346     | MIMAT0000773        | MALAT1          |
| hsa-miR-146b-5p | MIMAT0002809        | MALAT1          |
| hsa-miR-378c    | MIMAT0016847        | MALAT1          |
| hsa-miR-202-3p  | MIMAT0002811        | MALAT1          |
| hsa-miR-129-5p  | MIMAT0000242        | MALAT1          |
| hsa-miR-708-5p  | MIMAT0004926        | MALAT1          |
| hsa-miR-3167    | MIMAT0015042        | MALAT1          |
| hsa-miR-200c-3p | MIMAT0000617        | MALAT1          |
| hsa-miR-141-3p  | MIMAT0000432        | MALAT1          |
| hsa-miR-613     | MIMAT0003281        | MALAT1          |
| hsa-miR-26a-5p  | MIMAT0000082        | MALAT1          |
| hsa-miR-135a-5p | MIMAT0000428        | MALAT1          |
| hsa-miR-320d    | MIMAT0006764        | MALAT1          |
| hsa-miR-1297    | MIMAT0005886        | MALAT1          |
| hsa-miR-17-5p   | MIMAT0000070        | MALAT1          |
| hsa-miR-20a-5p  | MIMAT0000075        | MALAT1          |
| hsa-miR-92a-3p  | MIMAT0000092        | MALAT1          |
| hsa-miR-4306    | MIMAT0016858        | MALAT1          |
| hsa-miR-370-3p  | MIMAT0000722        | MALAT1          |
| hsa-miR-494-3p  | MIMAT0002816        | MALAT1          |
| hsa-miR-376a-3p | MIMAT0000729        | MALAT1          |
| hsa-miR-376b-3p | MIMAT0002172        | MALAT1          |
| hsa-miR-544a    | MIMAT0003164        | MALAT1          |
| hsa-miR-485-5p  | MIMAT0002175        | MALAT1          |
| hsa-miR-154-5p  | MIMAT0000452        | MALAT1          |
| hsa-miR-203a    | MIMAT0000264        | MALAT1          |
| hsa-miR-211-5p  | MIMAT0000268        | MALAT1          |

|                 |              |        |
|-----------------|--------------|--------|
| hsa-miR-422a    | MIMAT0001339 | MALAT1 |
| hsa-miR-328-3p  | MIMAT0000752 | MALAT1 |
| hsa-miR-140-5p  | MIMAT0000431 | MALAT1 |
| hsa-miR-22-3p   | MIMAT0000077 | MALAT1 |
| hsa-miR-144-3p  | MIMAT0000436 | MALAT1 |
| hsa-miR-142-3p  | MIMAT0000434 | MALAT1 |
| hsa-miR-338-3p  | MIMAT0000763 | MALAT1 |
| hsa-miR-320c    | MIMAT0005793 | MALAT1 |
| hsa-miR-1       | MIMAT0000416 | MALAT1 |
| hsa-miR-23a-3p  | MIMAT0000078 | MALAT1 |
| hsa-miR-181c-5p | MIMAT0000258 | MALAT1 |
| hsa-miR-181d-5p | MIMAT0002821 | MALAT1 |
| hsa-miR-150-5p  | MIMAT0000451 | MALAT1 |
| hsa-miR-125a-3p | MIMAT0004602 | MALAT1 |
| hsa-miR-519d-3p | MIMAT0002853 | MALAT1 |
| hsa-miR-4429    | MIMAT0018944 | MALAT1 |
| hsa-miR-4262    | MIMAT0016894 | MALAT1 |
| hsa-miR-217     | MIMAT0000274 | MALAT1 |
| hsa-miR-216a-5p | MIMAT0000273 | MALAT1 |
| hsa-miR-216b-5p | MIMAT0004959 | MALAT1 |
| hsa-miR-26b-5p  | MIMAT0000083 | MALAT1 |
| hsa-miR-149-5p  | MIMAT0000450 | MALAT1 |
| hsa-miR-499a-5p | MIMAT0002870 | MALAT1 |
| hsa-miR-124-3p  | MIMAT0000422 | MALAT1 |
| hsa-miR-155-5p  | MIMAT0000646 | MALAT1 |
| hsa-miR-185-5p  | MIMAT0000455 | MALAT1 |
| hsa-miR-378i    | MIMAT0019074 | MALAT1 |
| hsa-miR-378b    | MIMAT0014999 | MALAT1 |
| hsa-miR-425-5p  | MIMAT0003393 | MALAT1 |
| hsa-miR-28-5p   | MIMAT0000085 | MALAT1 |
| hsa-miR-378d    | MIMAT0018926 | MALAT1 |
| hsa-miR-367-3p  | MIMAT0000719 | MALAT1 |
| hsa-miR-3139    | MIMAT0015007 | MALAT1 |
| hsa-miR-143-3p  | MIMAT0000435 | MALAT1 |
| hsa-miR-145-5p  | MIMAT0000437 | MALAT1 |
| hsa-miR-378a-3p | MIMAT0000732 | MALAT1 |
| hsa-miR-378h    | MIMAT0018984 | MALAT1 |
| hsa-miR-146a-5p | MIMAT0000449 | MALAT1 |
| hsa-miR-378e    | MIMAT0018927 | MALAT1 |
| hsa-miR-1271-5p | MIMAT0005796 | MALAT1 |
| hsa-miR-206     | MIMAT0000462 | MALAT1 |
| hsa-miR-30a-5p  | MIMAT0000087 | MALAT1 |
| hsa-miR-4465    | MIMAT0018992 | MALAT1 |
| hsa-miR-4644    | MIMAT0019704 | MALAT1 |

|                 |              |        |
|-----------------|--------------|--------|
| hsa-miR-590-3p  | MIMAT0004801 | MALAT1 |
| hsa-miR-25-3p   | MIMAT0000081 | MALAT1 |
| hsa-miR-93-5p   | MIMAT0000093 | MALAT1 |
| hsa-miR-106b-5p | MIMAT0000680 | MALAT1 |
| hsa-miR-96-5p   | MIMAT0000095 | MALAT1 |
| hsa-miR-383-5p  | MIMAT0000738 | MALAT1 |
| hsa-miR-320a    | MIMAT0000510 | MALAT1 |
| hsa-miR-30b-5p  | MIMAT0000420 | MALAT1 |
| hsa-miR-30d-5p  | MIMAT0000245 | MALAT1 |
| hsa-miR-491-5p  | MIMAT0002807 | MALAT1 |
| hsa-miR-876-5p  | MIMAT0004924 | MALAT1 |
| hsa-miR-873-5p  | MIMAT0004953 | MALAT1 |
| hsa-miR-204-5p  | MIMAT0000265 | MALAT1 |
| hsa-miR-23b-3p  | MIMAT0000418 | MALAT1 |
| hsa-miR-32-5p   | MIMAT0000090 | MALAT1 |
| hsa-miR-455-5p  | MIMAT0003150 | MALAT1 |
| hsa-miR-4770    | MIMAT0019924 | MALAT1 |
| hsa-miR-23c     | MIMAT0018000 | MALAT1 |
| hsa-miR-374b-5p | MIMAT0004955 | MALAT1 |
| hsa-miR-374a-5p | MIMAT0000727 | MALAT1 |
| hsa-miR-384     | MIMAT0001075 | MALAT1 |
| hsa-miR-363-3p  | MIMAT0000707 | MALAT1 |
| hsa-miR-20b-5p  | MIMAT0001413 | MALAT1 |
| hsa-miR-106a-5p | MIMAT0000103 | MALAT1 |
| hsa-miR-503-5p  | MIMAT0002874 | MALAT1 |
| hsa-miR-506-3p  | MIMAT0002878 | MALAT1 |
| hsa-miR-224-5p  | MIMAT0000281 | MALAT1 |

---
